# Supplementary material for: Aqueous organometallic reactions of rhodium porphyrins: equilibrium thermodynamicsElectronic supplementary information (ESI) available: experimental details. See http://www.rsc.org/suppdata/cc/b2/b212027e/
Source: Royal Society of Chemistry journal article supplement (doi:10.1039/b212027e), 2003-01-17
Supplement: esi.doc [file esi.doc]

# Supporting Information for the Communication

Aqueous organometallic reactions of rhodium porphyrins: Equilibrium thermodynamics

# Xuefeng Fu, Leah Basickes and Bradford B. Wayland*

## Department of Chemistry, University of Pennsylvania, Philadelphia, PA 19104-6323 USA

*Fax: 215-573-6743; Tel: 215-898-6366; Email:wayland@sas.upenn.edu*

**Measurements of acid dissociation constants for (TSPP)Rh species in D2O.** pH/pD measurements were obtained on Orion model SA520 pH meter and Orion 9802 electrode which was calibrated by solutions of NaHCO3-Na­2CO3(0.025 M) at pH = 4.01 and potassium hydrogen phthalate(0.050 m) at pH=10.01. 1H NMR chemical shifts in D2O were referenced to 3-(trimethylsilyl)-1-propanesulfonic acid sodium salt.

Equilibrium constants (298 K) for reactions 1 and 2 were determined from the dependence of the pyrrole 1H NMR shifts on the hydrogen ion concentration.

1)[(TSPP)Rh­III(D2O)2]-3(**1**) [(TSPP)RhIII(D2O)(OD)]-4(**2**) + D+ K1 = 1.4  0.2  10-8

2) [(TSPP)RhIII(D2O)(OD)]-4 [(TSPP)RhIII(OD)2]-5 (**3**) + D+ K2 = 2.8  0.3  10-12

Mole fraction averaged 1H NMR chemical shifts for **1**, **2** and **3** were recorded at series of hydrogen ion concentration obtained by addition of HCl and NaOH. The data were analyzed for K1 and K2 by non linear least squared curve fitting to equation I where N1, N2, and N3 are the mole fractions and 1(pyr), 2(pyr) and 3(pyr) are the chemical shifts for species **1**, **2** and **3** respectively.

N1 + N2 + N3=1, , , ,

,

, plug in the equation (I)

(I)

A plot of the exp(-pDln10) vs the 1,2,3 obs(pyr) is shown in figure 1A. The best fit to (I) using 1(pyr) = 9.15 ppm and 3(pyr) = 8.94 ppm gives K1= 1.4  0.2  10-8, K2 = 2.8  0.3  10-12, and 2(pyr) = 9.04 ppm.

Figure 1. Determination points are the observed limiting fast exchange mole fraction averaged pyrrole 1H NMR chemical shifts for species [(TSPP)RhIii(D2O)2]-3 (**1**), [(TSPP)RhIii(D2O)(OD)]-4(**2**), [(TSPP)RhIii(OD)2]-4(**3**) (Figure 1A) and [(TSPP)RhI-D]-4 (**4**), [(TSPP)RhI]-5(**5**) (Figure 1B) in D2O as a function of -log10[D+]; solid line is the nonlinear least squares curve fitting line.

The dissociation constant (298 K) for [(TSPP)RhI-D]-4 in D2O was determined from the dependence of the pyrrole 1H NMR shifts on the hydrogen ion concentration.

3) [(TSPP)Rh-D]-4 (**4**) [(TSPP)RhI]-5 (**5**) + D+ K4 = 8.0  0.5  10-8

A series of [(TSPP)RhI]-5 (2.18  10-3 M) deuterium oxide solution were degassed by three freeze-pump-thaw cycles and then carried into a glove box. Samples with different pH values were obtained by mixing HCl with D2O solution of [(TSPP)RhI]-5 (**5**) in NMR tubes were taken out of the glove box after capping with a septum and wrapping with Teflon tape. 1H NMR spectra and pH values were measured and analyzed to determine the acid dissociation constant for **4**. The observed mole fraction averaged pyrrole 1H NMR shifts for **4** and **5** (4(pyr)) at various hydrogen ion concentrations were used in determining K4 by non-linear least squares curve fitting to equation II where N4 and N5 are mole fractions and 4(pyr) and 5(pyr) are the pyrrole shifts for species **4** and **5** respectively.

,

So , plug in the equation (II)

(II)

A plot of the exp(-pDln10) vs 4,5 obs(pyr) is shown in figure 1B. The best fit using 4(pyr) = 8.77 ppm and 5(pyr) = 8.32 ppm gives K4 = 8.0  0.5  10-8.

Experimental procedures: All manipulations were performed on a high-vacuum line equipped with a Welch Duo-Seal vacuum pump or in an inert atmosphere box unless otherwise noted. Deuterated D2O was degassed by three freeze-pump-thaw cycles just before use. Tetra p-sulfonatophenyl porphyrin sodium salt was purchased from Mid-Century Chemicals. Research grade hydrogen and carbon monoxide was purchased from Cambridge Isotope Laboratories, Inc.

Proton NMR spectra were obtained on Bruker AC-360 interfaced to an Aspect 300 computer with a temperature controlled 275-300 K. Chemical shifts were referenced to 3-trimethylsilyl-1propanesulfonix acid sodium salt. Carbon-13 NMR spectra were obtained on an AMX-500 instrument.

Proton NMR spectra was use to identify solution species and to determine the distribution of species at equilibrium.

[(TSPP)RhIII(D2O)2]-3 (**1**): **1** was synthesized by the literature methods of Ashley, Krishnamurthy and Neta. 1H NMR (D2O 360 MHz) (pyr): 9.15 (s, 8H, pyrrole), 8.45 (d, 8H, o-phenyl, JH-H = 8 Hz), 8.21 (d, 8H, m-phenyl. J H-H = 8Hz).

[(TSPP)RhI]-5 (**5**)/[(TSPP)Rh-D]-4 (**4**):Reaction of 1 (10-3 M) with H2/D2 in D2O produced **5** in basic solution ([D+] <10-10 M) and **4** in acidic D2O ([D+]> 10-5 M). 1H NMR (**5**) (D2O 360 MHz) (pyr): 8.32 (s, 8H, pyrrole), 8.20 (d, 8H, o-phenyl, J H-H= 8.2 Hz), 8.11 (d, 8H, m-phenyl, J H-H = 8.2 Hz). 1H NMR (4) (D2O 360 MHz) (pyr): 8.77(s, 8H, pyrrole), 8.20(s, 16 H, phenyl).

Substrate reactions of [(TSPP)Rh-D]-4 (**4**) were carried out by vacuum transfer of the substrate to vacuum adapted NMR tubes containing performed samples of **4** (10-3 M) in D2O at a defined hydrogen ion concentration. Substrate reactions of 4 are optimized when [D+] is ~ 10-4-10-5 M.

[(TSPP)Rh-CDO]-4 (**7**): A solution of **4** (10-3 M) was pressurized with CO (0.6 atm) to form **7**. 1H NMR (**7**) (D2O 360 MHz) (pyr): 8.89 (s, 8H, pyrrole), 8.54 (d, 4H, o-phenyl, JH-H = 8Hz), 8.31 (d, 4H, o-phenyl, JH-H = 8Hz), 8.20(d, 8H, m-phenyl, JH-H= 8Hz). 13C NMR (D2O, 500 MHz) (pyr): 218 (q, 1C, formyl, J103Rh-13C = 28 Hz, J2H-13C = 25 Hz).

[(TSPP)Rh-CH(OD)CH3]-4 (**8**): **4** reacts with CH3CHO to form **8**. 1H NMR(**8**) (D2O 360 MHz) (pyr): 8.44 (8 H, pyrrole), 8.30-8.00 (16 H, phenyl), -2.86 (br, 1 H, CH), -4.37 (br, 3H, CH3)

[(TSPP)Rh-CH2CH(D)X]-4 (X= (CO2CH3) (**9**): Solution of **4** reacts with methyl acrylate to form **9**. 1H NMR(**9**) (D2O 360 MHz) (pyr): 8.81 (s, 8H, pyrrole), 8.40-8.21 (m, 16H, phenyl), -4.14 (br, 1H, CH(D)), -5.71(br, 2H, CH2).
